# Supplementary material
Source: publisher site journal article supplement (https://www.dovepress.com/article/365314)
Supplement: Supplementary file 1 [file get_supplementary_file.php]

*NWMN2330* gene sequence

TTAATTGCTATCTTTTAAAATCCATTTAGATAATATAAATGTGATGGGTATCGTAATAATTAAACCAGCA

AATGGTGCAATTTCTGCTGGCAAATTTAGCCAGGATACAAATACATATAATAAAACTGTTTGTAAGCTTA

CGTTGACAATCTGCGTAATTGGAAAACTAATGAATTTTCTCCAAGTAGGTTTTACCCTGTAAACAAAATA

ACAATTCAAATAATATGAAATCACAAAAGCGACTAGAAATCCGGTAATATGACTAATCATATATTCAATG

TGTAATAATTTTAACAGCAATAAATAGACAACATAATAATTTAACGTATTAATGCCGCCAACAATGATAA

ATTTTAAAATTTCAGCATGCGTTTGTGTTAGTTTCAT

differentially expressed genes

| *Gene_id* | readcount_ *Newman-ΔNWMN2330* | readcount_ *Newman* | log2.Fold_change. | pvalue | qvalue | Gene Name | Blast swiss prot |
| --- | --- | --- | --- | --- | --- | --- | --- |
| *NWMN_0006* | 164.2759 | 443.231 | -1.4319 | 1.13E-29 | 1.02E-28 | -- | sp|Q2G2P8|NNRD_STAA8 ADP-dependent (S)-NAD(P)H-hydrate dehydratase OS=Staphylococcus aureus (strain NCTC 8325) GN=nnrD PE=3 SV=2//0 |
| *NWMN_0007* | 689.8796 | 336.8756 | 1.0341 | 3.22E-30 | 2.91E-29 | -- | sp|A8YYT1|HUTH_STAAT Histidine ammonia-lyase OS=Staphylococcus aureus (strain USA300 / TCH1516) GN=hutH PE=3 SV=1//0 |
| *NWMN_0016* | 670.5298 | 278.6812 | 1.2667 | 1.05E-39 | 1.29E-38 | -- | sp|Q8NYX6|PURA_STAAW Adenylosuccinate synthetase OS=Staphylococcus aureus (strain MW2) GN=purA PE=3 SV=1//0 |
| *NWMN_0041* | 19.3498 | 94.56598 | -2.289 | 4.13E-13 | 2.00E-12 | -- | sp|Q2G1Q2|PLC_STAA8 1-phosphatidylinositol phosphodiesterase OS=Staphylococcus aureus (strain NCTC 8325) GN=plc PE=1 SV=1//0 |
| *NWMN_0055* | 898.3836 | 2078.696 | -1.2103 | ######## | ######## | -- | sp|P02976|SPA_STAA8 Immunoglobulin G-binding protein A OS=Staphylococcus aureus (strain NCTC 8325) GN=spa PE=1 SV=3//0 |
| *NWMN_0071* | 1343.824 | 4448.614 | -1.727 | 0 | 0 | -- | sp|P66776|BUTA_STAAW Diacetyl reductase [(S)-acetoin forming] OS=Staphylococcus aureus (strain MW2) GN=butA PE=3 SV=1//0 |
| *NWMN_0080* | 48.96684 | 100.5861 | -1.0386 | 3.27E-05 | 7.95E-05 | -- | sp|A6TVU0|DEOD_ALKMQ Purine nucleoside phosphorylase DeoD-type OS=Alkaliphilus metalliredigens (strain QYMF) GN=deoD PE=3 SV=1//2.97523e-75 |
| *NWMN_0095* | 75.42473 | 34.11399 | 1.1447 | 4.31E-05 | 0.000102 | -- | sp|P95695|CAP5A_STAAE Capsular polysaccharide type 5 biosynthesis protein cap5A OS=Staphylococcus aureus (strain Newman) GN=cap5A PE=3 SV=1//1.99518e-142 |
| *NWMN_0120* | 314.3355 | 151.2554 | 1.0553 | 4.70E-15 | 2.49E-14 | -- | sp|O05398|YRHF_BACSU Uncharacterized protein YrhF OS=Bacillus subtilis (strain 168) GN=yrhF PE=4 SV=1//5.77136e-22 |
| *NWMN_0124* | 174.938 | 384.7857 | -1.1372 | 1.85E-18 | 1.15E-17 | -- | sp|P55810|PSF1_BACPU 4&apos;-phosphopantetheinyl transferase psf-1 OS=Bacillus pumilus GN=psf-1 PE=3 SV=1//2.36767e-10 |
| *NWMN_0130* | 53.70557 | 172.5766 | -1.6841 | 1.59E-15 | 8.62E-15 | -- | sp|P94499|BRNQ_BACSU Branched-chain amino acid transport system carrier protein BrnQ OS=Bacillus subtilis (strain 168) GN=brnQ PE=3 SV=2//2.92107e-98 |
| *NWMN_0156* | 46.59748 | 125.9207 | -1.4342 | 1.57E-09 | 5.90E-09 | -- | sp|P54724|YFIH_BACSU Uncharacterized protein YfiH OS=Bacillus subtilis (strain 168) GN=yfiH PE=4 SV=2//1.32586e-60 |
| *NWMN_0157* | 2.764257 | 26.58884 | -3.2659 | 3.35E-06 | 9.17E-06 | -- | sp|P43984|Y318_HAEIN Uncharacterized protein HI_0318 OS=Haemophilus influenzae (strain ATCC 51907 / DSM 11121 / KW20 / Rd) GN=HI_0318 PE=4 SV=1//2.22451e-44 |
| *NWMN_0158* | 686.3255 | 237.7946 | 1.5292 | 4.52E-53 | 6.90E-52 | -- | sp|P0AGC2|UHPT_SHIFL Hexose phosphate transport protein OS=Shigella flexneri GN=uhpT PE=3 SV=1//2.00732e-140 |
| *NWMN_0164* | 28.43236 | 73.74641 | -1.375 | 7.78E-06 | 2.07E-05 | -- | sp|O14169|PGC1_SCHPO Phosphatidylglycerol phospholipase C OS=Schizosaccharomyces pombe (strain 972 / ATCC 24843) GN=SPAC4D7.02c PE=3 SV=2//1.49782e-13 |
| *NWMN_0165* | 20.53448 | 224.5001 | -3.4506 | 1.75E-43 | 2.25E-42 | -- | -//- |
| *NWMN_0166* | 23.29874 | 92.0576 | -1.9823 | 6.94E-11 | 2.95E-10 | -- | sp|P07767|STC1_STAAU Staphylocoagulase OS=Staphylococcus aureus PE=1 SV=2//1.02803e-39 |
| *NWMN_0176* | 3680.806 | 1725.766 | 1.0928 | ######## | ######## | -- | sp|A8Z0K3|LDH1_STAAT L-lactate dehydrogenase 1 OS=Staphylococcus aureus (strain USA300 / TCH1516) GN=ldh1 PE=3 SV=1//0 |
| *NWMN_0177* | 28.82725 | 61.95702 | -1.1038 | 0.000601 | 0.001225 | -- | sp|Q7CCJ4|PTG3C_STAES PTS system glucose-specific EIICBA component OS=Staphylococcus epidermidis (strain ATCC 12228) GN=ptsG PE=3 SV=1//1.00151e-138 |
| *NWMN_0194* | 59.23408 | 137.961 | -1.2198 | 2.72E-08 | 9.28E-08 | -- | sp|P60614|LYTS_STAAW Sensor protein LytS OS=Staphylococcus aureus (strain MW2) GN=lytS PE=3 SV=1//0 |
| *NWMN_0204* | 20.13959 | 57.94361 | -1.5246 | 1.79E-05 | 4.55E-05 | -- | sp|Q8NYG6|RBSU_STAAW Putative ribose uptake protein RbsU OS=Staphylococcus aureus (strain MW2) GN=rbsU PE=3 SV=1//0 |
| *NWMN_0252* | 82.53282 | 165.3023 | -1.0021 | 2.40E-07 | 7.34E-07 | -- | -//- |
| *NWMN_0262* | 100.6979 | 497.412 | -2.3044 | 1.30E-62 | 2.27E-61 | -- | sp|P10335|LIP2_STAAU Lipase 2 OS=Staphylococcus aureus GN=lip2 PE=1 SV=1//0 |
| *NWMN_0322* | 42.64854 | 108.8638 | -1.352 | 8.29E-08 | 2.68E-07 | -- | sp|Q8FAJ3|ULAA_ECOL6 Ascorbate-specific permease IIC component UlaA OS=Escherichia coli O6:H1 (strain CFT073 / ATCC 700928 / UPEC) GN=ulaA PE=3 SV=1//1.36538e-37 |
| *NWMN_0362* | 18.16512 | 199.918 | -3.4602 | 5.35E-39 | 6.47E-38 | -- | -//- |
| *NWMN_0374* | 125.5763 | 56.94026 | 1.141 | 1.40E-07 | 4.46E-07 | -- | sp|Q65M31|TCYP_BACLD L-cystine uptake protein TcyP OS=Bacillus licheniformis (strain ATCC 14580 / DSM 13 / JCM 2505 / NBRC 12200 / NCIMB 9375 / NRRL NRS-1264 / Gibson 46) GN=tcyP PE=3 SV=1//0 |
| *NWMN_0379* | 99.51326 | 239.5504 | -1.2674 | 4.20E-14 | 2.18E-13 | -- | sp|P42086|PBUX_BACSU Xanthine permease OS=Bacillus subtilis (strain 168) GN=pbuX PE=3 SV=1//1.75104e-142 |
| *NWMN_0391* | 2.369363 | 17.80951 | -2.9101 | 0.000316 | 0.000682 | -- | -//- |
| *NWMN_0400* | 0 | 21.57208 | -5.7716 | 1.51E-06 | 4.25E-06 | -- | -//- |
| *NWMN_0401* | 22.90384 | 76.75647 | -1.7447 | 4.99E-08 | 1.65E-07 | -- | -//- |
| *NWMN_0402* | 0 | 1107.952 | -10.454 | ######## | ######## | -- | -//- |
| *NWMN_0419* | 473.8726 | 955.1916 | -1.0113 | 6.01E-36 | 6.89E-35 | -- | sp|Q5HIM4|Y495_STAAC UPF0753 protein SACOL0495 OS=Staphylococcus aureus (strain COL) GN=SACOL0495 PE=3 SV=1//0 |
| *NWMN_0429* | 534.2914 | 263.38 | 1.0205 | 2.62E-23 | 2.01E-22 | -- | sp|Q7A1T4|SLE1_STAAW N-acetylmuramoyl-L-alanine amidase sle1 OS=Staphylococcus aureus (strain MW2) GN=sle1 PE=3 SV=1//1.04603e-145 |
| *NWMN_0439* | 67.52685 | 321.0728 | -2.2494 | 6.87E-40 | 8.54E-39 | -- | sp|P39795|TREC_BACSU Trehalose-6-phosphate hydrolase OS=Bacillus subtilis (strain 168) GN=treA PE=1 SV=2//0 |
| *NWMN_0440* | 61.20855 | 236.2895 | -1.9488 | 5.16E-25 | 4.18E-24 | -- | sp|P39796|TRER_BACSU Trehalose operon transcriptional repressor OS=Bacillus subtilis (strain 168) GN=treR PE=1 SV=2//4.59062e-49 |
| *NWMN_0482* | 1378.969 | 612.2959 | 1.1713 | 5.65E-71 | 1.06E-69 | -- | sp|Q7A1R6|PDXT_STAAW Pyridoxal 5&apos;-phosphate synthase subunit PdxT OS=Staphylococcus aureus (strain MW2) GN=pdxT PE=3 SV=1//1.22362e-120 |
| *NWMN_0502* | 177.7022 | 383.2807 | -1.1089 | 1.06E-17 | 6.44E-17 | -- | sp|A6QEJ2|RL7_STAAE 50S ribosomal protein L7/L12 OS=Staphylococcus aureus (strain Newman) GN=rplL PE=3 SV=1//1.93087e-43 |
| *NWMN_0513* | 1229.305 | 2563.817 | -1.0605 | ######## | ######## | -- | sp|A6QEK3|HCHA_STAAE Molecular chaperone Hsp31 and glyoxalase 3 OS=Staphylococcus aureus (strain Newman) GN=hchA PE=3 SV=1//0 |
| *NWMN_0529* | 224.6946 | 550.5897 | -1.293 | 2.60E-31 | 2.47E-30 | -- | sp|Q8NXX2|GCH4_STAAW GTP cyclohydrolase FolE2 OS=Staphylococcus aureus (strain MW2) GN=folE2 PE=3 SV=1//0 |
| *NWMN_0536* | 108.9907 | 218.7309 | -1.005 | 2.58E-09 | 9.43E-09 | -- | sp|Q7A771|PROP_STAAN Putative proline/betaine transporter OS=Staphylococcus aureus (strain N315) GN=proP PE=3 SV=1//0 |
| *NWMN_0537* | 10.26724 | 0 | 5.3551 | 0.000832 | 0.001642 | -- | -//- |
| *NWMN_0542* | 3850.61 | 509.2014 | 2.9188 | 0 | 0 | -- | sp|Q7A1P6|VRAX_STAAW Protein VraX OS=Staphylococcus aureus (strain MW2) GN=vraX PE=4 SV=1//1.71914e-34 |
| *NWMN_0548* | 16.98044 | 44.39835 | -1.3866 | 0.00048 | 0.000995 | -- | -//- |
| *NWMN_0555* | 212.8478 | 437.9634 | -1.041 | 3.78E-18 | 2.34E-17 | -- | sp|Q9KWG3|PMK_STRC1 Phosphomevalonate kinase OS=Streptomyces sp. (strain CL190) PE=1 SV=1//2.07556e-60 |
| *NWMN_0577* | 1429.516 | 6284.248 | -2.1362 | 0 | 0 | -- | sp|Q8NXU1|ADH_STAAW Alcohol dehydrogenase OS=Staphylococcus aureus (strain MW2) GN=adh PE=3 SV=1//0 |
| *NWMN_0599* | 67.92175 | 136.4559 | -1.0065 | 2.47E-06 | 6.80E-06 | -- | sp|Q8NXS9|MNHG2_STAAW Putative antiporter subunit mnhG2 OS=Staphylococcus aureus (strain MW2) GN=mnhG2 PE=3 SV=1//5.64307e-81 |
| *NWMN_0605* | 112.9396 | 32.10728 | 1.8146 | 2.47E-12 | 1.15E-11 | -- | -//- |
| *NWMN_0650* | 28.43236 | 57.44193 | -1.0146 | 0.00209 | 0.003851 | -- | sp|Q5HHY7|Y741_STAAC UPF0178 protein SACOL0741 OS=Staphylococcus aureus (strain COL) GN=SACOL0741 PE=3 SV=1//4.53342e-108 |
| *NWMN_0663* | 32.77619 | 10.5352 | 1.6374 | 0.000437 | 0.000918 | -- | -//- |
| *NWMN_0664* | 141.372 | 63.71289 | 1.1498 | 1.91E-08 | 6.62E-08 | -- | sp|Q5HHX4|NORA_STAAC Quinolone resistance protein NorA OS=Staphylococcus aureus (strain COL) GN=norA PE=3 SV=1//0 |
| *NWMN_0674* | 220.7457 | 5080.225 | -4.5244 | 0 | 0 | -- | sp|Q840P7|SAES_STAAE Histidine protein kinase SaeS OS=Staphylococcus aureus (strain Newman) GN=saeS PE=1 SV=1//0 |
| *NWMN_0675* | 104.252 | 2738.149 | -4.7151 | 0 | 0 | -- | sp|Q7A1J1|SAER_STAAW Response regulator SaeR OS=Staphylococcus aureus (strain MW2) GN=saeR PE=3 SV=1//1.63981e-169 |
| *NWMN_0676* | 2.764257 | 1170.411 | -8.7259 | ######## | ######## | -- | -//- |
| *NWMN_0677* | 7.10809 | 2916.997 | -8.6808 | 0 | 0 | -- | -//- |
| *NWMN_0680* | 11.45192 | 31.35477 | -1.4531 | 0.002345 | 0.004265 | -- | sp|O31676|QUED_BACSU 6-carboxy-5,6,7,8-tetrahydropterin synthase OS=Bacillus subtilis (strain 168) GN=queD PE=1 SV=2//1.36298e-59 |
| *NWMN_0684* | 152.429 | 359.2002 | -1.2367 | 1.19E-19 | 7.82E-19 | -- | sp|O42951|PABC_SCHPO Putative aminodeoxychorismate lyase OS=Schizosaccharomyces pombe (strain 972 / ATCC 24843) GN=SPBC19G7.02 PE=3 SV=1//3.7692e-09 |
| *NWMN_0689* | 482.5603 | 1013.386 | -1.0704 | 1.07E-41 | 1.35E-40 | -- | sp|O34748|RECQ_BACSU Probable ATP-dependent DNA helicase RecQ OS=Bacillus subtilis (strain 168) GN=recQ PE=3 SV=1//3.72059e-161 |
| *NWMN_0692* | 18.16512 | 45.4017 | -1.3216 | 0.000673 | 0.001361 | -- | sp|A8YZZ5|HIS8_STAAT Histidinol-phosphate aminotransferase OS=Staphylococcus aureus (strain USA300 / TCH1516) GN=hisC PE=3 SV=1//0 |
| *NWMN_0695* | 170.1993 | 359.2002 | -1.0776 | 5.61E-16 | 3.11E-15 | -- | sp|Q5HHU6|Y787_STAAC Putative lipid kinase SACOL0787 OS=Staphylococcus aureus (strain COL) GN=SACOL0787 PE=3 SV=1//0 |
| *NWMN_0740* | 420.562 | 207.9448 | 1.0161 | 1.44E-18 | 9.02E-18 | -- | sp|P35168|CGGR_BACMD Central glycolytic genes regulator OS=Bacillus megaterium (strain DSM 319) GN=cggR PE=3 SV=1//2.22883e-97 |
| *NWMN_0757* | 3.554045 | 159.2822 | -5.486 | 6.24E-39 | 7.48E-38 | -- | sp|P07767|STC1_STAAU Staphylocoagulase OS=Staphylococcus aureus PE=1 SV=2//1.0279e-21 |
| *NWMN_0758* | 16.98044 | 96.82352 | -2.5115 | 8.89E-15 | 4.65E-14 | -- | sp|A6QF98|EMP_STAAE Extracellular matrix protein-binding protein emp OS=Staphylococcus aureus (strain Newman) GN=ssp PE=1 SV=1//0 |
| *NWMN_0759* | 3.554045 | 72.74306 | -4.3553 | 1.79E-17 | 1.08E-16 | -- | -//- |
| *NWMN_0760* | 3.159151 | 82.27491 | -4.7028 | 3.51E-20 | 2.36E-19 | -- | sp|Q5HHM4|NUC_STAAC Thermonuclease OS=Staphylococcus aureus (strain COL) GN=nuc PE=3 SV=1//9.99166e-155 |
| *NWMN_0783* | 1676.324 | 4516.341 | -1.4299 | ######## | ######## | -- | sp|Q5HHH4|Y912_STAAC UPF0337 protein SACOL0912 OS=Staphylococcus aureus (strain COL) GN=SACOL0912 PE=3 SV=1//9.41584e-37 |
| *NWMN_0793* | 80.55835 | 36.62237 | 1.1373 | 2.60E-05 | 6.45E-05 | -- | sp|O32135|YUNF_BACSU UPF0759 protein YunF OS=Bacillus subtilis (strain 168) GN=yunF PE=3 SV=2//4.99567e-92 |
| *NWMN_0827* | 3407.144 | 1410.965 | 1.2719 | ######## | ######## | -- | sp|P60299|OAT2_STAAW Ornithine aminotransferase 2 OS=Staphylococcus aureus (strain MW2) GN=rocD2 PE=3 SV=1//0 |
| *NWMN_0851* | 397.2632 | 148.2453 | 1.4221 | 1.83E-28 | 1.59E-27 | -- | sp|P69775|MAP_STAAN Protein map OS=Staphylococcus aureus (strain N315) GN=map PE=1 SV=1//1.71847e-12 |
| *NWMN_0884* | 38.30471 | 16.05364 | 1.2546 | 0.001758 | 0.003285 | -- | sp|O31630|YJCH_BACSU Uncharacterized protein YjcH OS=Bacillus subtilis (strain 168) GN=yjcH PE=4 SV=1//7.7103e-61 |
| *NWMN_0895* | 29.22215 | 77.00731 | -1.3979 | 3.69E-06 | 1.01E-05 | -- | sp|P40396|COMK_BACSU Competence transcription factor OS=Bacillus subtilis (strain 168) GN=comK PE=2 SV=1//1.46411e-15 |
| *NWMN_0913* | 393.7092 | 796.4111 | -1.0164 | 1.70E-30 | 1.56E-29 | -- | sp|A8Z0D7|MEND_STAAT 2-succinyl-5-enolpyruvyl-6-hydroxy-3-cyclohexene-1-carboxylate synthase OS=Staphylococcus aureus (strain USA300 / TCH1516) GN=menD PE=3 SV=1//0 |
| *NWMN_0919* | 61.99834 | 156.523 | -1.3361 | 1.91E-10 | 7.87E-10 | -- | sp|P16524|PATA_BACSU Putative N-acetyl-LL-diaminopimelate aminotransferase OS=Bacillus subtilis (strain 168) GN=patA PE=1 SV=3//8.62966e-98 |
| *NWMN_0920* | 121.2324 | 56.94026 | 1.0903 | 5.98E-07 | 1.76E-06 | -- | sp|O31660|YKRP_BACSU Putative membrane-bound acyltransferase YkrP OS=Bacillus subtilis (strain 168) GN=ykrP PE=3 SV=1//4.00269e-55 |
| *NWMN_0927* | 246.4138 | 523.75 | -1.0878 | 6.45E-23 | 4.79E-22 | -- | sp|Q7A184|QOX4_STAAW Probable quinol oxidase subunit 4 OS=Staphylococcus aureus (strain MW2) GN=qoxD PE=3 SV=1//5.60199e-50 |
| *NWMN_0931* | 584.8378 | 259.6175 | 1.1716 | 4.12E-31 | 3.86E-30 | -- | -//- |
| *NWMN_0953* | 61.60344 | 141.4727 | -1.1994 | 2.82E-08 | 9.56E-08 | -- | sp|O34505|YTHB_BACSU Putative cytochrome bd menaquinol oxidase subunit II OS=Bacillus subtilis (strain 168) GN=ythB PE=1 SV=1//5.2358e-38 |
| *NWMN_1066* | 3.159151 | 578.4327 | -7.5165 | ######## | ######## | -- | sp|Q6GHS9|FIB_STAAR Fibrinogen-binding protein OS=Staphylococcus aureus (strain MRSA252) GN=fib PE=3 SV=1//1.70574e-08 |
| *NWMN_1067* | 17.37533 | 171.5733 | -3.3037 | 1.75E-32 | 1.71E-31 | -- | sp|A6QG57|FLIPR_STAAE FPRL1 inhibitory protein OS=Staphylococcus aureus (strain Newman) GN=flr PE=1 SV=1//1.0431e-92 |
| *NWMN_1069* | 5.528514 | 732.949 | -7.0507 | ######## | ######## | -- | sp|A6QG59|FIB_STAAE Fibrinogen-binding protein OS=Staphylococcus aureus (strain Newman) GN=fib PE=1 SV=1//6.1839e-99 |
| *NWMN_1070* | 1.974469 | 370.4879 | -7.5518 | 5.32E-82 | 1.09E-80 | -- | sp|Q7A0F6|SCIN_STAAW Staphylococcal complement inhibitor OS=Staphylococcus aureus (strain MW2) GN=scn PE=3 SV=1//1.73624e-17 |
| *NWMN_1073* | 3.948939 | 4066.839 | -10.008 | 0 | 0 | -- | sp|Q2G1X0|HLA_STAA8 Alpha-hemolysin OS=Staphylococcus aureus (strain NCTC 8325) GN=hly PE=1 SV=1//0 |
| *NWMN_1075* | 5.528514 | 30.35141 | -2.4568 | 1.82E-05 | 4.62E-05 | -- | -//- |
| *NWMN_1076* | 3.159151 | 23.07711 | -2.8689 | 4.70E-05 | 0.000111 | -- | -//- |
| *NWMN_1077* | 3.159151 | 23.82962 | -2.9151 | 3.05E-05 | 7.46E-05 | -- | -//- |
| *NWMN_1079* | 66.34217 | 144.2319 | -1.1204 | 1.16E-07 | 3.71E-07 | -- | sp|Q7A138|ARCC1_STAAW Carbamate kinase 1 OS=Staphylococcus aureus (strain MW2) GN=arcC1 PE=3 SV=1//0 |
| *NWMN_1084* | 516.1263 | 1355.278 | -1.3928 | 1.46E-83 | 3.08E-82 | -- | sp|P11699|GGI3_STAHA Antibacterial protein 3 OS=Staphylococcus haemolyticus PE=1 SV=1//8.99337e-07 |
| *NWMN_1086* | 646.0464 | 300.0024 | 1.1067 | 2.00E-31 | 1.91E-30 | -- | sp|Q5HGQ5|Y1189_STAAC Uncharacterized N-acetyltransferase SACOL1189 OS=Staphylococcus aureus (strain COL) GN=SACOL1189 PE=3 SV=1//2.86957e-105 |
| *NWMN_1111* | 43.04343 | 18.31118 | 1.2331 | 0.001066 | 0.002054 | -- | sp|P65619|PYRB_STAAW Aspartate carbamoyltransferase OS=Staphylococcus aureus (strain MW2) GN=pyrB PE=3 SV=1//0 |
| *NWMN_1112* | 90.4307 | 42.14081 | 1.1016 | 1.38E-05 | 3.57E-05 | -- | sp|P65907|PYRC_STAAW Dihydroorotase OS=Staphylococcus aureus (strain MW2) GN=pyrC PE=1 SV=1//0 |
| *NWMN_1114* | 234.9619 | 98.07771 | 1.2604 | 7.51E-15 | 3.95E-14 | -- | sp|A8Z3P0|CARB_STAAT Carbamoyl-phosphate synthase large chain OS=Staphylococcus aureus (strain USA300 / TCH1516) GN=carB PE=3 SV=1//0 |
| *NWMN_1134* | 691.4592 | 1523.591 | -1.1398 | 1.97E-68 | 3.64E-67 | -- | sp|P66154|RL28_STAAW 50S ribosomal protein L28 OS=Staphylococcus aureus (strain MW2) GN=rpmB PE=3 SV=1//1.69767e-38 |
| *NWMN_1171* | 46.59748 | 18.56202 | 1.3279 | 0.000316 | 0.000682 | -- | sp|Q7A121|CDSA_STAAW Phosphatidate cytidylyltransferase OS=Staphylococcus aureus (strain MW2) GN=cdsA PE=3 SV=1//0 |
| *NWMN_1195* | 4772.292 | 2169.248 | 1.1375 | ######## | ######## | -- | sp|P67279|RNY_STAAW Ribonuclease Y OS=Staphylococcus aureus (strain MW2) GN=rny PE=3 SV=1//0 |
| *NWMN_1196* | 117.6784 | 57.19109 | 1.041 | 2.12E-06 | 5.89E-06 | -- | -//- |
| *NWMN_1209* | 837.175 | 314.8019 | 1.4111 | 1.91E-57 | 3.25E-56 | -- | sp|Q7A105|GLPD_STAAW Aerobic glycerol-3-phosphate dehydrogenase OS=Staphylococcus aureus (strain MW2) GN=glpD PE=3 SV=2//0 |
| *NWMN_1239* | 33.96087 | 112.1246 | -1.7232 | 6.55E-11 | 2.79E-10 | -- | sp|P94417|AK3_BACSU Aspartokinase 3 OS=Bacillus subtilis (strain 168) GN=yclM PE=1 SV=1//1.05687e-147 |
| *NWMN_1240* | 256.2861 | 635.373 | -1.3098 | 1.39E-36 | 1.61E-35 | -- | sp|P19582|DHOM_BACSU Homoserine dehydrogenase OS=Bacillus subtilis (strain 168) GN=hom PE=1 SV=2//6.07432e-88 |
| *NWMN_1241* | 255.1014 | 549.8372 | -1.1079 | 1.13E-24 | 9.04E-24 | -- | sp|P04990|THRC_BACSU Threonine synthase OS=Bacillus subtilis (strain 168) GN=thrC PE=3 SV=1//5.82471e-161 |
| *NWMN_1242* | 116.4937 | 288.4639 | -1.3081 | 1.86E-17 | 1.11E-16 | -- | sp|A8Z213|KHSE_STAAT Homoserine kinase OS=Staphylococcus aureus (strain USA300 / TCH1516) GN=thrB PE=3 SV=1//0 |
| *NWMN_1245* | 82.13793 | 194.1487 | -1.241 | 2.28E-11 | 9.93E-11 | -- | sp|P25737|LYSP_ECOLI Lysine-specific permease OS=Escherichia coli (strain K12) GN=lysP PE=1 SV=5//8.59428e-107 |
| *NWMN_1249* | 224.6946 | 90.80341 | 1.3071 | 5.45E-15 | 2.87E-14 | -- | sp|A6QGN9|GUAC_STAAE GMP reductase OS=Staphylococcus aureus (strain Newman) GN=guaC PE=3 SV=1//0 |
| *NWMN_1263* | 4024.758 | 1800.014 | 1.1609 | ######## | ######## | -- | sp|P63434|ACNA_STAAW Aconitate hydratase A OS=Staphylococcus aureus (strain MW2) GN=acnA PE=3 SV=1//0 |
| *NWMN_1265* | 142.5567 | 70.73635 | 1.011 | 3.42E-07 | 1.03E-06 | -- | sp|Q5HG67|Y1387_STAAC Uncharacterized protein SACOL1387 OS=Staphylococcus aureus (strain COL) GN=SACOL1387 PE=3 SV=1//2.80846e-67 |
| *NWMN_1314* | 156.378 | 73.99725 | 1.0795 | 1.85E-08 | 6.43E-08 | -- | -//- |
| *NWMN_1327* | 272.8717 | 709.3702 | -1.3783 | 6.77E-44 | 8.83E-43 | -- | sp|Q7A0W5|ARLS_STAAW Signal transduction histidine-protein kinase ArlS OS=Staphylococcus aureus (strain MW2) GN=arlS PE=3 SV=1//0 |
| *NWMN_1328* | 129.1303 | 292.2264 | -1.1783 | 3.69E-15 | 1.97E-14 | -- | sp|P0C001|ARLR_STAAW Response regulator ArlR OS=Staphylococcus aureus (strain MW2) GN=arlR PE=3 SV=1//5.89717e-147 |
| *NWMN_1346* | 23.69363 | 114.633 | -2.2745 | 1.83E-15 | 9.85E-15 | -- | sp|A8Z415|NORB_STAAT Quinolone resistance protein NorB OS=Staphylococcus aureus (strain USA300 / TCH1516) GN=norB PE=3 SV=1//0 |
| *NWMN_1347* | 12.24171 | 109.1146 | -3.156 | 1.83E-20 | 1.26E-19 | -- | sp|O34739|STET_BACSU Serine/threonine exchanger SteT OS=Bacillus subtilis (strain 168) GN=steT PE=1 SV=1//1.1266e-72 |
| *NWMN_1348* | 41.85875 | 328.3471 | -2.9716 | 4.71E-55 | 7.73E-54 | -- | sp|Q8NWQ4|TDCB_STAAW L-threonine dehydratase catabolic TdcB OS=Staphylococcus aureus (strain MW2) GN=tdcB PE=3 SV=1//0 |
| *NWMN_1349* | 24.48342 | 190.8878 | -2.9628 | 1.21E-32 | 1.22E-31 | -- | sp|P99151|DHA1_STAAN Alanine dehydrogenase 1 OS=Staphylococcus aureus (strain N315) GN=ald1 PE=1 SV=1//0 |
| *NWMN_1357* | 1182.312 | 561.3757 | 1.0746 | 1.24E-53 | 1.92E-52 | -- | sp|A6U1R6|Y1535_STAA2 UPF0398 protein SaurJH1_1535 OS=Staphylococcus aureus (strain JH1) GN=SaurJH1_1535 PE=3 SV=1//3.76275e-138 |
| *NWMN_1358* | 674.8736 | 240.0521 | 1.4913 | 2.01E-50 | 2.93E-49 | -- | -//- |
| *NWMN_1392* | 272.0819 | 120.6531 | 1.1732 | 2.39E-15 | 1.28E-14 | -- | sp|P10245|FER_BACTH Ferredoxin OS=Bacillus thermoproteolyticus PE=1 SV=1//2.02813e-28 |
| *NWMN_1393* | 683.9562 | 308.5309 | 1.1485 | 4.75E-35 | 5.27E-34 | -- | sp|E5QVT2|RIBU_STAAH Riboflavin transporter RibU OS=Staphylococcus aureus (strain TCH60) GN=ribU PE=1 SV=1//1.08159e-111 |
| *NWMN_1439* | 1527.055 | 528.0143 | 1.5321 | ######## | ######## | -- | sp|A6QH79|GCSPB_STAAE Probable glycine dehydrogenase (decarboxylating) subunit 2 OS=Staphylococcus aureus (strain Newman) GN=gcvPB PE=3 SV=1//0 |
| *NWMN_1440* | 1035.017 | 374.5013 | 1.4666 | 1.36E-74 | 2.63E-73 | -- | sp|Q6G930|GCSPA_STAAS Probable glycine dehydrogenase (decarboxylating) subunit 1 OS=Staphylococcus aureus (strain MSSA476) GN=gcvPA PE=3 SV=1//0 |
| *NWMN_1441* | 579.3093 | 206.4398 | 1.4886 | 2.01E-43 | 2.57E-42 | -- | sp|P64226|GCST_STAAW Aminomethyltransferase OS=Staphylococcus aureus (strain MW2) GN=gcvT PE=3 SV=1//0 |
| *NWMN_1468* | 429.6445 | 994.5732 | -1.2109 | 7.97E-50 | 1.14E-48 | -- | sp|P67035|SYG_STAAW Glycine--tRNA ligase OS=Staphylococcus aureus (strain MW2) GN=glyQS PE=3 SV=1//0 |
| *NWMN_1505* | 152.429 | 56.94026 | 1.4206 | 7.44E-12 | 3.39E-11 | -- | sp|P42964|YCSG_BACSU Uncharacterized membrane protein YcsG OS=Bacillus subtilis (strain 168) GN=ycsG PE=3 SV=4//6.43271e-97 |
| *NWMN_1506* | 67.92175 | 22.57543 | 1.5891 | 7.16E-07 | 2.09E-06 | -- | sp|Q2FXX2|Y1708_STAA8 UPF0271 protein SAOUHSC_01708 OS=Staphylococcus aureus (strain NCTC 8325) GN=SAOUHSC_01708 PE=3 SV=1//0 |
| *NWMN_1507* | 206.9244 | 55.9369 | 1.8872 | 2.19E-22 | 1.56E-21 | -- | sp|P49787|ACCC1_BACSU Biotin carboxylase 1 OS=Bacillus subtilis (strain 168) GN=accC1 PE=3 SV=3//1.13105e-138 |
| *NWMN_1508* | 40.27917 | 11.28772 | 1.8353 | 2.50E-05 | 6.23E-05 | -- | sp|P0ABE1|BCCP_SHIFL Biotin carboxyl carrier protein of acetyl-CoA carboxylase OS=Shigella flexneri GN=accB PE=3 SV=1//2.30201e-16 |
| *NWMN_1509* | 153.6137 | 32.35812 | 2.2471 | 8.00E-21 | 5.54E-20 | -- | sp|Q7WY77|KIPA_BACSU KipI antagonist OS=Bacillus subtilis (strain 168) GN=kipA PE=2 SV=2//2.68753e-64 |
| *NWMN_1510* | 52.12599 | 11.03688 | 2.2397 | 5.29E-08 | 1.74E-07 | -- | sp|P60495|KIPI_BACSU Kinase A inhibitor OS=Bacillus subtilis (strain 168) GN=kipI PE=1 SV=1//2.59124e-52 |
| *NWMN_1526* | 26.063 | 65.46875 | -1.3288 | 4.12E-05 | 9.81E-05 | -- | -//- |
| *NWMN_1533* | 84.90218 | 190.1353 | -1.1632 | 3.45E-10 | 1.37E-09 | -- | sp|P60912|SYH_STAAW Histidine--tRNA ligase OS=Staphylococcus aureus (strain MW2) GN=hisS PE=3 SV=1//0 |
| *NWMN_1552* | 559.1697 | 142.4761 | 1.9726 | 6.20E-61 | 1.07E-59 | -- | -//- |
| *NWMN_1553* | 85.29708 | 8.528497 | 3.3221 | 1.52E-17 | 9.21E-17 | -- | -//- |
| *NWMN_1576* | 399.2377 | 3728.458 | -3.2233 | 0 | 0 | -- | sp|Q8NW68|SYT_STAAW Threonine--tRNA ligase OS=Staphylococcus aureus (strain MW2) GN=thrS PE=1 SV=1//0 |
| *NWMN_1587* | 3623.151 | 1453.356 | 1.3179 | ######## | ######## | -- | sp|P99167|IDH_STAAN Isocitrate dehydrogenase [NADP] OS=Staphylococcus aureus (strain N315) GN=icd PE=1 SV=1//0 |
| *NWMN_1588* | 2443.998 | 866.1441 | 1.4966 | ######## | ######## | -- | sp|P39120|CISY2_BACSU Citrate synthase 2 OS=Bacillus subtilis (strain 168) GN=citZ PE=1 SV=2//1.09796e-163 |
| *NWMN_1601* | 595.5 | 1519.577 | -1.3515 | 2.92E-89 | 6.38E-88 | -- | sp|Q2FXM0|Y1815_STAA8 UPF0173 metal-dependent hydrolase SAOUHSC_01815 OS=Staphylococcus aureus (strain NCTC 8325) GN=SAOUHSC_01815 PE=3 SV=1//1.40923e-168 |
| *NWMN_1606* | 236.9363 | 68.47881 | 1.7908 | 8.61E-24 | 6.77E-23 | -- | sp|P37876|YTXK_BACSU Uncharacterized protein YtxK OS=Bacillus subtilis (strain 168) GN=ytxK PE=4 SV=2//1.10805e-57 |
| *NWMN_1704* | 0 | 70.73635 | -7.4848 | 4.33E-17 | 2.55E-16 | -- | sp|A8Z4N7|SPLC_STAAT Serine protease SplC OS=Staphylococcus aureus (strain USA300 / TCH1516) GN=splC PE=3 SV=1//1.26938e-148 |
| *NWMN_1705* | 2.764257 | 102.342 | -5.2104 | 2.02E-25 | 1.68E-24 | -- | sp|A8Z4N8|SPLB_STAAT Serine protease SplB OS=Staphylococcus aureus (strain USA300 / TCH1516) GN=splB PE=3 SV=1//3.81258e-173 |
| *NWMN_1706* | 1.579575 | 89.04754 | -5.817 | 1.47E-22 | 1.06E-21 | -- | sp|A6QHZ6|SPLA_STAAE Serine protease SplA OS=Staphylococcus aureus (strain Newman) GN=splA PE=3 SV=1//3.28484e-137 |
| *NWMN_1708* | 3.159151 | 78.01066 | -4.6261 | 4.21E-19 | 2.69E-18 | -- | -//- |
| *NWMN_1710* | 649.6004 | 296.2398 | 1.1328 | 1.06E-32 | 1.08E-31 | -- | -//- |
| *NWMN_1763* | 129.9201 | 56.68942 | 1.1965 | 2.76E-08 | 9.40E-08 | -- | sp|Q92CV8|TAGH_LISIN Teichoic acids export ATP-binding protein TagH OS=Listeria innocua serovar 6a (strain CLIP 11262) GN=tagH PE=3 SV=1//3.69175e-15 |
| *NWMN_1766* | 632.2251 | 257.8616 | 1.2938 | 1.05E-38 | 1.25E-37 | -- | sp|Q7A0I6|MGT_STAAW Monofunctional glycosyltransferase OS=Staphylococcus aureus (strain MW2) GN=mgt PE=1 SV=1//1.15714e-174 |
| *NWMN_1811* | 30.01193 | 94.0643 | -1.6481 | 6.96E-09 | 2.48E-08 | -- | sp|P19653|KILA_BPP1 Protein kilA OS=Enterobacteria phage P1 GN=kilA PE=3 SV=1//1.0743e-17 |
| *NWMN_1821* | 238.5159 | 532.2785 | -1.1581 | 1.23E-25 | 1.04E-24 | -- | sp|O34437|YFKH_BACSU Putative ribonuclease-like protein YfkH OS=Bacillus subtilis (strain 168) GN=yfkH PE=4 SV=1//3.54413e-24 |
| *NWMN_1822* | 352.2453 | 163.7973 | 1.1047 | 8.11E-18 | 4.97E-17 | -- | sp|Q5HEP0|VRAR_STAAC Response regulator protein VraR OS=Staphylococcus aureus (strain COL) GN=vraR PE=3 SV=1//1.74784e-139 |
| *NWMN_1823* | 515.7314 | 165.5532 | 1.6393 | 2.60E-44 | 3.53E-43 | -- | sp|Q7A0H9|VRAS_STAAW Sensor protein VraS OS=Staphylococcus aureus (strain MW2) GN=vraS PE=3 SV=1//0 |
| *NWMN_1824* | 221.9304 | 42.89332 | 2.3713 | 3.59E-31 | 3.38E-30 | -- | sp|O32199|LIAF_BACSU Protein LiaF OS=Bacillus subtilis (strain 168) GN=liaF PE=2 SV=1//2.66846e-06 |
| *NWMN_1825* | 109.3856 | 15.05029 | 2.8616 | 1.90E-19 | 1.25E-18 | -- | -//- |
| *NWMN_1832* | 187.5746 | 90.55257 | 1.0506 | 1.63E-09 | 6.11E-09 | -- | sp|Q8RA32|DPO3_CALS4 DNA polymerase III PolC-type OS=Caldanaerobacter subterraneus subsp. tengcongensis (strain DSM 15242 / JCM 11007 / NBRC 100824 / MB4) GN=polC PE=3 SV=1//3.86427e-20 |
| *NWMN_1834* | 287.8776 | 126.4224 | 1.1872 | 2.02E-16 | 1.15E-15 | -- | -//- |
| *NWMN_1872* | 71.47579 | 3281.464 | -5.5207 | 0 | 0 | -- | sp|A6QIG2|OMP7_STAAE 65 kDa membrane protein OS=Staphylococcus aureus (strain Newman) GN=NWMN_1872 PE=1 SV=1//0 |
| *NWMN_1873* | 0 | 23.82962 | -5.9151 | 4.31E-07 | 1.29E-06 | -- | sp|P09978|PHLC_STAAU Phospholipase C OS=Staphylococcus aureus GN=hlb PE=1 SV=1//1.01699e-17 |
| *NWMN_1876* | 100.6979 | 3168.336 | -4.9756 | 0 | 0 | -- | sp|Q7A0F6|SCIN_STAAW Staphylococcal complement inhibitor OS=Staphylococcus aureus (strain MW2) GN=scn PE=3 SV=1//6.16981e-78 |
| *NWMN_1877* | 0 | 99.08106 | -7.971 | 2.07E-22 | 1.48E-21 | -- | sp|Q6GFB3|CHIPS_STAAR Chemotaxis inhibitory protein OS=Staphylococcus aureus (strain MRSA252) GN=chp PE=3 SV=1//8.47122e-105 |
| *NWMN_1924* | 89.64091 | 187.3761 | -1.0637 | 7.26E-09 | 2.57E-08 | -- | -//- |
| *NWMN_1927* | 11.05703 | 1019.657 | -6.527 | ######## | ######## | -- | sp|P21224|LUKL1_STAAC Uncharacterized leukocidin-like protein 1 OS=Staphylococcus aureus (strain COL) GN=SACOL2004 PE=2 SV=3//0 |
| *NWMN_1928* | 8.292771 | 1103.939 | -7.0566 | ######## | ######## | -- | sp|Q5HEH9|LUKL2_STAAC Uncharacterized leukocidin-like protein 2 OS=Staphylococcus aureus (strain COL) GN=SACOL2006 PE=2 SV=1//0 |
| *NWMN_1981* | 82.53282 | 35.86985 | 1.2022 | 8.82E-06 | 2.32E-05 | -- | sp|A8Z4X9|ATKB_STAAT Potassium-transporting ATPase B chain OS=Staphylococcus aureus (strain USA300 / TCH1516) GN=kdpB PE=3 SV=1//0 |
| *NWMN_1982* | 85.29708 | 28.09387 | 1.6022 | 2.30E-08 | 7.96E-08 | -- | sp|A8Z4Y0|ATKA_STAAT Potassium-transporting ATPase A chain OS=Staphylococcus aureus (strain USA300 / TCH1516) GN=kdpA PE=3 SV=1//0 |
| *NWMN_1983* | 596.6846 | 269.651 | 1.1459 | 1.09E-30 | 1.02E-29 | -- | sp|P94608|KDPD_CLOAB Sensor protein KdpD OS=Clostridium acetobutylicum (strain ATCC 824 / DSM 792 / JCM 1419 / LMG 5710 / VKM B-1787) GN=kdpD PE=3 SV=2//6.42136e-111 |
| *NWMN_2048* | 405.9509 | 838.0502 | -1.0457 | 1.67E-33 | 1.77E-32 | -- | sp|O07609|YHFK_BACSU Uncharacterized sugar epimerase YhfK OS=Bacillus subtilis (strain 168) GN=yhfK PE=2 SV=1//4.44456e-37 |
| *NWMN_2061* | 142.5567 | 66.97378 | 1.0899 | 6.24E-08 | 2.03E-07 | -- | sp|A6QGY4|EBHA_STAAE Extracellular matrix-binding protein EbhA OS=Staphylococcus aureus (strain Newman) GN=ebhA PE=4 SV=1//4.10842e-14 |
| *NWMN_2069* | 91.61538 | 45.15086 | 1.0208 | 3.80E-05 | 9.15E-05 | -- | sp|Q99S98|MDEP_STAAU Multidrug resistance efflux pump SepA OS=Staphylococcus aureus GN=sepA PE=1 SV=1//2.33714e-86 |
| *NWMN_2096* | 18.16512 | 45.4017 | -1.3216 | 0.000673 | 0.001361 | -- | sp|A8YYF9|LACD_STAAT Tagatose 1,6-diphosphate aldolase OS=Staphylococcus aureus (strain USA300 / TCH1516) GN=lacD PE=3 SV=1//0 |
| *NWMN_2097* | 17.37533 | 43.89667 | -1.3371 | 0.00074 | 0.00148 | -- | sp|P0A0B8|LACC_STAAW Tagatose-6-phosphate kinase OS=Staphylococcus aureus (strain MW2) GN=lacC PE=3 SV=1//0 |
| *NWMN_2109* | 6871.548 | 1105.695 | 2.6357 | 0 | 0 | -- | sp|A6QIG2|OMP7_STAAE 65 kDa membrane protein OS=Staphylococcus aureus (strain Newman) GN=NWMN_1872 PE=1 SV=1//1.75851e-11 |
| *NWMN_2110* | 176.5176 | 585.707 | -1.7304 | 1.11E-50 | 1.63E-49 | -- | sp|P95676|ALDC_LACLA Alpha-acetolactate decarboxylase OS=Lactococcus lactis subsp. lactis (strain IL1403) GN=aldB PE=3 SV=1//5.72402e-67 |
| *NWMN_2111* | 411.8743 | 1384.125 | -1.7487 | ######## | ######## | -- | sp|Q04789|ILVX_BACSU Acetolactate synthase OS=Bacillus subtilis (strain 168) GN=alsS PE=2 SV=3//0 |
| *NWMN_2157* | 73.45026 | 34.36482 | 1.0958 | 9.57E-05 | 0.000219 | -- | -//- |
| *NWMN_2158* | 42.64854 | 89.80005 | -1.0742 | 5.39E-05 | 0.000126 | -- | sp|Q6GEH7|GLCU_STAAR Probable glucose uptake protein GlcU OS=Staphylococcus aureus (strain MRSA252) GN=glcU PE=3 SV=1//1.7414e-171 |
| *NWMN_2190* | 109.3856 | 43.89667 | 1.3172 | 4.14E-08 | 1.38E-07 | -- | sp|P67405|URE1_STAAW Urease subunit alpha OS=Staphylococcus aureus (strain MW2) GN=ureC PE=3 SV=1//0 |
| *NWMN_2194* | 79.37367 | 36.12069 | 1.1358 | 3.03E-05 | 7.43E-05 | -- | sp|A8Z391|URED_STAAT Urease accessory protein UreD OS=Staphylococcus aureus (strain USA300 / TCH1516) GN=ureD PE=3 SV=1//0 |
| *NWMN_2199* | 87.27155 | 42.14081 | 1.0503 | 3.92E-05 | 9.39E-05 | -- | sp|Q7A423|SSAA2_STAAN Staphylococcal secretory antigen ssaA2 OS=Staphylococcus aureus (strain N315) GN=ssaA2 PE=1 SV=1//4.83631e-107 |
| *NWMN_2201* | 63.57791 | 177.0917 | -1.4779 | 2.38E-13 | 1.19E-12 | -- | sp|Q44297|ODH_ARTSC Opine dehydrogenase OS=Arthrobacter sp. (strain 1C) GN=odh PE=1 SV=1//3.19996e-31 |
| *NWMN_2223* | 106.6213 | 30.35141 | 1.8127 | 1.04E-11 | 4.68E-11 | -- | -//- |
| *NWMN_2229* | 1665.267 | 4186.99 | -1.3302 | ######## | ######## | -- | sp|P40398|YHXD_BACSU Uncharacterized oxidoreductase YhxD OS=Bacillus subtilis (strain 168) GN=yhxD PE=3 SV=2//1.26014e-100 |
| *NWMN_2253* | 417.4028 | 879.1877 | -1.0747 | 1.23E-36 | 1.43E-35 | -- | sp|P54585|YHCA_BACSU Uncharacterized MFS-type transporter YhcA OS=Bacillus subtilis (strain 168) GN=yhcA PE=3 SV=2//9.44563e-128 |
| *NWMN_2255* | 41.85875 | 16.55532 | 1.3382 | 0.000596 | 0.001216 | -- | -//- |
| *NWMN_2282* | 408.3203 | 1574.26 | -1.9469 | ######## | ######## | -- | sp|P80238|GS26_BACSU General stress protein 26 OS=Bacillus subtilis (strain 168) GN=ydaG PE=1 SV=2//7.2496e-29 |
| *NWMN_2317* | 5.528514 | 3560.647 | -9.331 | 0 | 0 | -- | sp|A8YYG7|SBI_STAAT Immunoglobulin-binding protein sbi OS=Staphylococcus aureus (strain USA300 / TCH1516) GN=sbi PE=3 SV=1//0 |
| *NWMN_2318* | 47.78216 | 2566.074 | -5.7469 | 0 | 0 | -- | sp|P0A073|HLGA_STAAW Gamma-hemolysin component A OS=Staphylococcus aureus (strain MW2) GN=hlgA PE=3 SV=1//0 |
| *NWMN_2319* | 9.872347 | 1474.677 | -7.2228 | 0 | 0 | -- | sp|Q07227|HLGC_STAAU Gamma-hemolysin component C OS=Staphylococcus aureus GN=hlgC PE=3 SV=1//0 |
| *NWMN_2320* | 21.32427 | 1386.633 | -6.0229 | 0 | 0 | -- | sp|P0A076|HLGB_STAAW Gamma-hemolysin component B OS=Staphylococcus aureus (strain MW2) GN=hlgB PE=3 SV=1//0 |
| *NWMN_2330* | 0 | 41.38829 | -6.7116 | 4.47E-11 | 1.92E-10 | -- | -//- |
| *NWMN_2331* | 279.5849 | 99.58274 | 1.4893 | 7.89E-22 | 5.58E-21 | -- | sp|Q9Z9P2|GLXK_BACHD Glycerate kinase OS=Bacillus halodurans (strain ATCC BAA-125 / DSM 18197 / FERM 7344 / JCM 9153 / C-125) GN=glxK PE=3 SV=2//4.14265e-115 |
| *NWMN_2332* | 475.4522 | 174.8342 | 1.4433 | 1.93E-34 | 2.12E-33 | -- | -//- |
| *NWMN_2333* | 93.58985 | 196.1554 | -1.0676 | 2.90E-09 | 1.06E-08 | -- | sp|P96709|YDGK_BACSU Uncharacterized MFS-type transporter YdgK OS=Bacillus subtilis (strain 168) GN=ydgK PE=3 SV=1//8.06897e-47 |
| *NWMN_2364* | 83.7175 | 172.5766 | -1.0436 | 4.68E-08 | 1.55E-07 | -- | sp|P33590|NIKA_ECOLI Nickel-binding periplasmic protein OS=Escherichia coli (strain K12) GN=nikA PE=1 SV=1//2.37832e-108 |
| *NWMN_2377* | 2321.976 | 4705.974 | -1.0191 | ######## | ######## | -- | -//- |
| *NWMN_2397* | 8.687665 | 69.23133 | -2.9944 | 5.90E-13 | 2.84E-12 | -- | sp|Q5HD51|FNBA_STAAC Fibronectin-binding protein A OS=Staphylococcus aureus (strain COL) GN=fnbA PE=3 SV=1//0 |
| *NWMN_2399* | 11.84682 | 285.9555 | -4.5932 | 2.28E-65 | 4.10E-64 | -- | sp|Q5HD51|FNBA_STAAC Fibronectin-binding protein A OS=Staphylococcus aureus (strain COL) GN=fnbA PE=3 SV=1//0 |
| *NWMN_2406* | 95.95921 | 350.6717 | -1.8696 | 2.07E-34 | 2.26E-33 | -- | sp|P96595|YDAT_BACSU Uncharacterized protein YdaT OS=Bacillus subtilis (strain 168) GN=ydaT PE=4 SV=1//4.91929e-12 |
| *NWMN_2412* | 4.738726 | 21.0704 | -2.1526 | 0.00099 | 0.00192 | -- | sp|P96605|YDBJ_BACSU Uncharacterized ABC transporter ATP-binding protein YdbJ OS=Bacillus subtilis (strain 168) GN=ydbJ PE=3 SV=1//3.81338e-53 |
| *NWMN_2413* | 6.713196 | 29.84974 | -2.1526 | 8.86E-05 | 0.000204 | -- | -//- |
| *NWMN_2421* | 786.6286 | 310.0359 | 1.3432 | 2.13E-50 | 3.08E-49 | -- | sp|Q2FVA4|Y2829_STAA8 Putative NAD(P)H nitroreductase SAOUHSC_02829 OS=Staphylococcus aureus (strain NCTC 8325) GN=SAOUHSC_02829 PE=3 SV=1//2.3755e-169 |
| *NWMN_2431* | 396.8683 | 198.1621 | 1.002 | 2.98E-17 | 1.77E-16 | -- | -//- |
| *NWMN_2456* | 702.1213 | 94.81682 | 2.8885 | ######## | ######## | -- | -//- |
| *NWMN_2461* | 170.5942 | 471.074 | -1.4654 | 1.66E-32 | 1.64E-31 | -- | sp|Q7A3E2|CRTN_STAAN Dehydrosqualene desaturase OS=Staphylococcus aureus (strain N315) GN=crtN PE=1 SV=1//0 |
| *NWMN_2462* | 48.96684 | 121.4057 | -1.31 | 3.36E-08 | 1.13E-07 | -- | sp|Q8NUQ5|CRTM_STAAW Dehydrosqualene synthase OS=Staphylococcus aureus (strain MW2) GN=crtM PE=3 SV=1//0 |
| *NWMN_2463* | 57.25961 | 141.9744 | -1.31 | 2.35E-09 | 8.64E-09 | -- | sp|Q8NUQ4|CRTQ_STAAW 4,4&apos;-diaponeurosporenoate glycosyltransferase OS=Staphylococcus aureus (strain MW2) GN=crtQ PE=3 SV=1//0 |
| *NWMN_2464* | 42.25364 | 87.54251 | -1.0509 | 9.09E-05 | 0.000208 | -- | sp|Q53589|CRTP_STAAE Diapolycopene oxygenase OS=Staphylococcus aureus (strain Newman) GN=crtP PE=3 SV=2//0 |
| *NWMN_2487* | 509.4131 | 1396.667 | -1.4551 | 6.07E-92 | 1.35E-90 | -- | sp|Q87PM1|Y1481_VIBPA Uncharacterized protein VP1481 OS=Vibrio parahaemolyticus serotype O3:K6 (strain RIMD 2210633) GN=VP1481 PE=3 SV=1//3.11904e-39 |
| *NWMN_2491* | 183.6257 | 84.28161 | 1.1235 | 3.17E-10 | 1.26E-09 | -- | sp|P16681|PHNB_ECOLI Protein PhnB OS=Escherichia coli (strain K12) GN=phnB PE=4 SV=1//6.40084e-10 |
| *NWMN_2509* | 165.8554 | 75.75312 | 1.1305 | 1.89E-09 | 7.02E-09 | -- | sp|A8Z5A4|BETA_STAAT Oxygen-dependent choline dehydrogenase OS=Staphylococcus aureus (strain USA300 / TCH1516) GN=betA PE=3 SV=1//0 |
| *NWMN_2510* | 781.495 | 309.5343 | 1.3361 | 1.07E-49 | 1.51E-48 | -- | sp|P71016|BETB_BACSU Betaine aldehyde dehydrogenase OS=Bacillus subtilis (strain 168) GN=gbsA PE=1 SV=1//0 |
| *NWMN_2512* | 15.40086 | 48.41176 | -1.6523 | 3.14E-05 | 7.67E-05 | -- | -//- |
| *NWMN_2514* | 267.3432 | 1024.172 | -1.9377 | ######## | ######## | -- | sp|Q9KM76|NRDG_VIBCH Anaerobic ribonucleoside-triphosphate reductase-activating protein OS=Vibrio cholerae serotype O1 (strain ATCC 39315 / El Tor Inaba N16961) GN=nrdG PE=3 SV=1//3.96953e-28 |
| *NWMN_2515* | 832.8312 | 2629.787 | -1.6588 | ######## | ######## | -- | sp|Q9L646|NRDD_SALTY Anaerobic ribonucleoside-triphosphate reductase OS=Salmonella typhimurium (strain LT2 / SGSC1412 / ATCC 700720) GN=nrdD PE=3 SV=1//0 |
| *NWMN_2529* | 312.3611 | 1149.089 | -1.8792 | ######## | ######## | -- | sp|Q7A382|CLFB_STAAN Clumping factor B OS=Staphylococcus aureus (strain N315) GN=clfB PE=1 SV=1//1.50761e-25 |
| *NWMN_2530* | 979.3368 | 92.30843 | 3.4073 | ######## | ######## | -- | sp|A8Z5D0|ARCR_STAAT HTH-type transcriptional regulator ArcR OS=Staphylococcus aureus (strain USA300 / TCH1516) GN=arcR PE=3 SV=1//9.08568e-177 |
| *NWMN_2531* | 1247.865 | 112.8772 | 3.4666 | ######## | ######## | -- | sp|Q5HCR5|ARCC2_STAAC Carbamate kinase 2 OS=Staphylococcus aureus (strain COL) GN=arcC2 PE=3 SV=1//0 |
| *NWMN_2532* | 1615.511 | 120.6531 | 3.7431 | 0 | 0 | -- | sp|Q46170|ARCD_CLOPE Arginine/ornithine antiporter OS=Clostridium perfringens (strain 13 / Type A) GN=arcD PE=3 SV=2//5.36133e-127 |
| *NWMN_2533* | 961.5666 | 75.25144 | 3.6756 | ######## | ######## | -- | sp|Q8NUK8|OTCC_STAAW Ornithine carbamoyltransferase, catabolic OS=Staphylococcus aureus (strain MW2) GN=arcB PE=3 SV=1//0 |
| *NWMN_2534* | 1119.129 | 76.75647 | 3.8659 | ######## | ######## | -- | sp|Q8NUK7|ARCA_STAAW Arginine deiminase OS=Staphylococcus aureus (strain MW2) GN=arcA PE=3 SV=1//0 |
| *NWMN_2541* | 68.31664 | 170.5699 | -1.3201 | 4.55E-11 | 1.95E-10 | -- | sp|Q59935|MANA_STRMU Mannose-6-phosphate isomerase OS=Streptococcus mutans serotype c (strain ATCC 700610 / UA159) GN=pmi PE=3 SV=2//5.0388e-113 |
| *NWMN_2557* | 41.85875 | 170.3191 | -2.0246 | 2.32E-19 | 1.50E-18 | -- | -//- |
| *NWMN_2564* | 216.0069 | 96.32184 | 1.1651 | 2.24E-12 | 1.05E-11 | -- | sp|Q79ZV4|ICAR_STAAW Biofilm operon icaADBC HTH-type negative transcriptional regulator IcaR OS=Staphylococcus aureus (strain MW2) GN=icaR PE=3 SV=1//1.0797e-131 |
| *NWMN_2586* | 285.9032 | 136.7068 | 1.0644 | 5.36E-14 | 2.76E-13 | -- | sp|Q7A338|DRP35_STAAN Lactonase drp35 OS=Staphylococcus aureus (strain N315) GN=drp35 PE=1 SV=1//0 |
| *NWMN_2596* | 318.6794 | 147.4928 | 1.1115 | 2.08E-16 | 1.18E-15 | -- | sp|O06977|YVCN_BACSU Uncharacterized acetyltransferase YvcN OS=Bacillus subtilis (strain 168) GN=yvcN PE=3 SV=1//3.56338e-24 |
| *NWMN_2597* | 1906.153 | 822.9999 | 1.2117 | ######## | ######## | -- | -//- |
| *NWMN_2620* | 99.11836 | 209.4498 | -1.0794 | 5.95E-10 | 2.29E-09 | -- | sp|P85222|HLY1U_STACU Hemolysin H1U OS=Staphylococcus cohnii subsp. urealyticus PE=1 SV=1//2.21805e-06 |
| *Novel00002* | 1213.509 | 121.1548 | 3.3243 | ######## | ######## | - | - |
| *Novel00003* | 3.159151 | 427.679 | -7.0808 | 1.47E-97 | 3.44E-96 | - | - |
| *Novel00004* | 31.9864 | 12.29107 | 1.3798 | 0.002136 | 0.003914 | - | - |
| *Novel00005* | 32.3813 | 209.7007 | -2.6951 | 1.66E-32 | 1.64E-31 | - | - |
| *sRNA00022* | 0 | 12.29107 | -4.6195 | 0.000394 | 0.000829 | - | - |

**Note**: Italics represent gene names
